# Supplementary material for: Further results on state feedback stabilization of stochastic high-order nonlinear systems
Source: Springer Nature journal article supplement (doi:10.1007/s11432-013-5056-6), 2014-01-08
Supplement: 11432_2013_5056_MOESM1_ESM.pdf [file 11432_2013_5056_MOESM1_ESM.pdf]

中文题目：随机高阶非线性系统状态反馈镇定的进一步结果

关键词：随机高阶非线性系统，时变时滞，状态反馈，齐次占优方法，符号函数

创新点：1，与现有论文[24-36]相比，本文不再要求系统的阶次具有严格的大小关系，并且进一步放宽了系统非线性函数的假设条件。2，在控制器设计过程中引入了符号函数，成功地构造了一个二次连续可微的Lyapunov函数和连续可微的控制器，保证了随机非线性系统解的存在唯一性。3，齐次占优方法的引入，使得系统的控制器设计过程更加简洁，处理非线性函数更加简单。
